# Supplementary material for: Exploring the Non-Covalent Bonding in Water Clusters
Source: MDPI journal article supplement (doi:10.3390/ijms24065271), 2023-03-09
Supplement: s1 [file s1]

# Supplementary Material

Exploring the non-covalent bonding in water clusters.

Luis E. Seijas<sup>1</sup>, Cesar H. Zambrano<sup>2</sup>, Rafael Almeida<sup>3</sup>, Jorge Alí-Torres<sup>4</sup>, Luis Rincón<sup>2</sup> and F. Javier Torres<sup>2,1\*</sup>

**Figure S1:** Water clusters considered, including atom labels (a) (H<sub>2</sub>O)<sub>2</sub>, 2a; (b) (H<sub>2</sub>O)<sub>3</sub>, 3a; (c) (H<sub>2</sub>O)<sub>4</sub>, 4a; (d) (H<sub>2</sub>O)<sub>4</sub>, 4b; (e) (H<sub>2</sub>O)<sub>5</sub>, 5a; (f) (H<sub>2</sub>O)<sub>5</sub>, 5a; (f) (H<sub>2</sub>O)<sub>6</sub>, 6a; (g) (H<sub>2</sub>O)<sub>6</sub>, 6b; (h) (H<sub>2</sub>O)<sub>6</sub>, 6c; (i) (H<sub>2</sub>O)<sub>6</sub>, 6d; (j) (H<sub>2</sub>O)<sub>7</sub>, 7a; (k) (H<sub>2</sub>O)<sub>7</sub>, 7b; (l) (H<sub>2</sub>O)<sub>7</sub>, 7c.

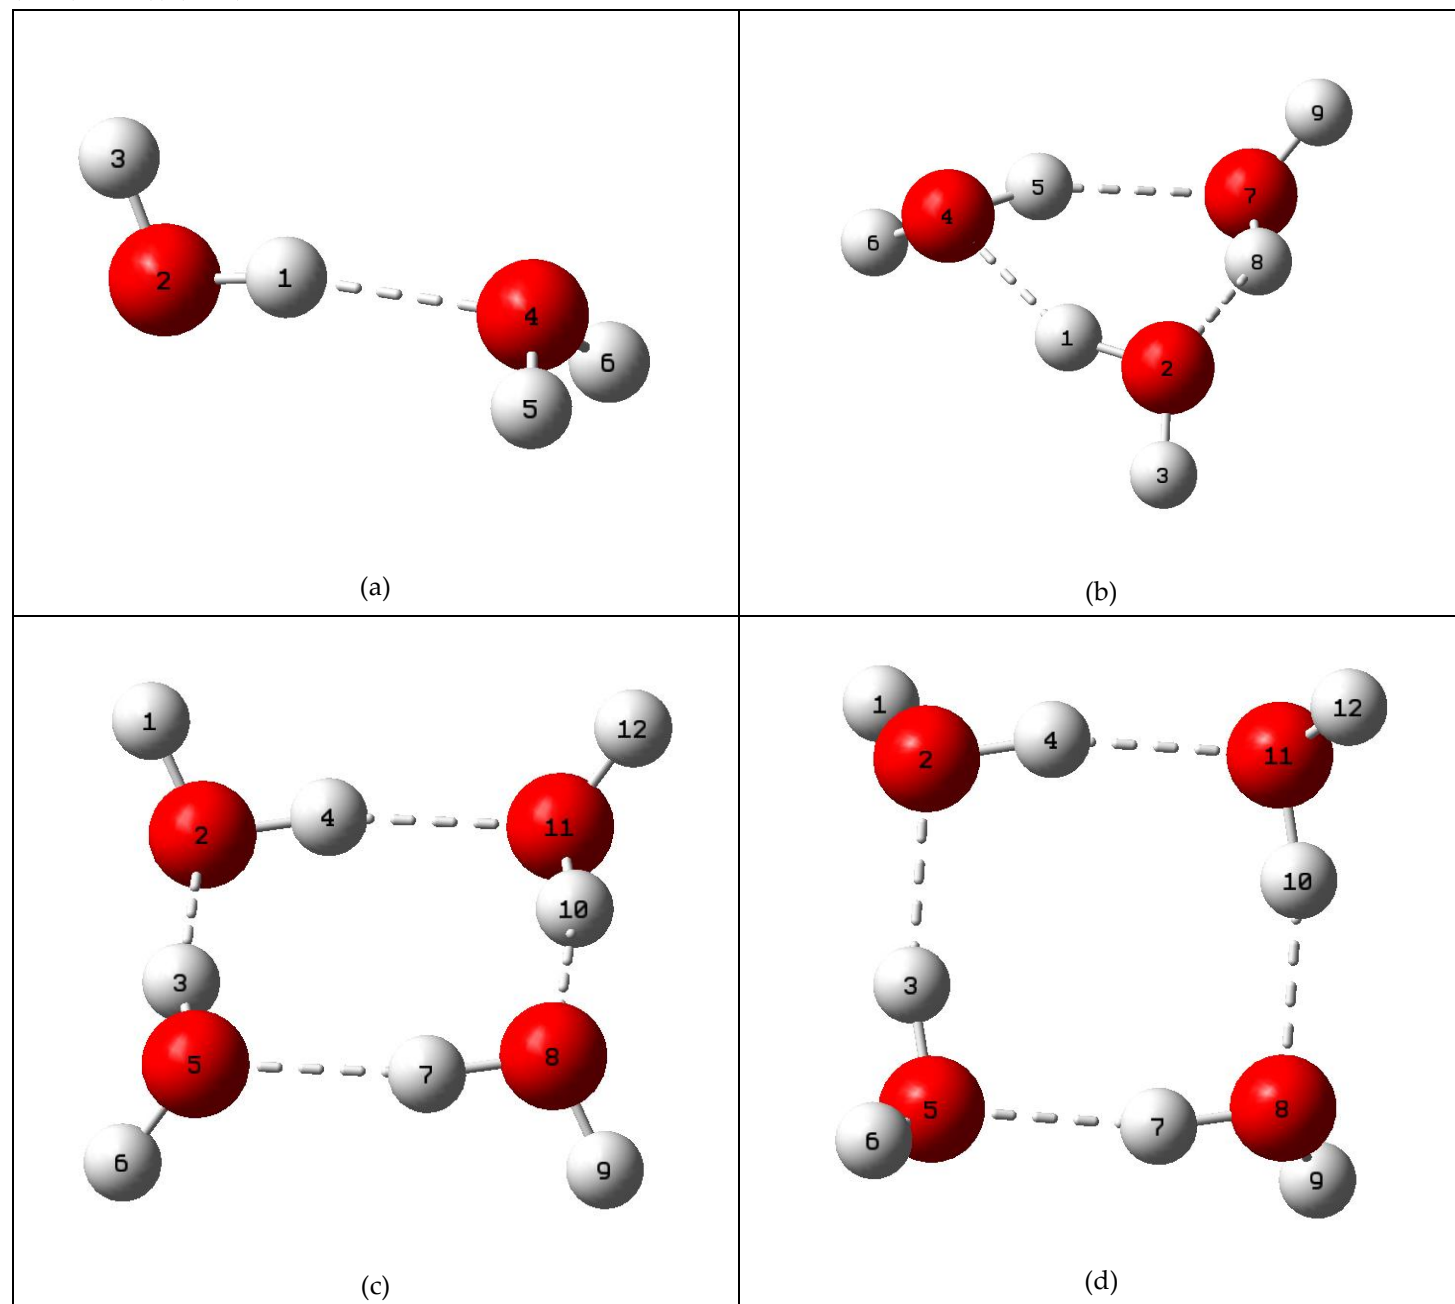

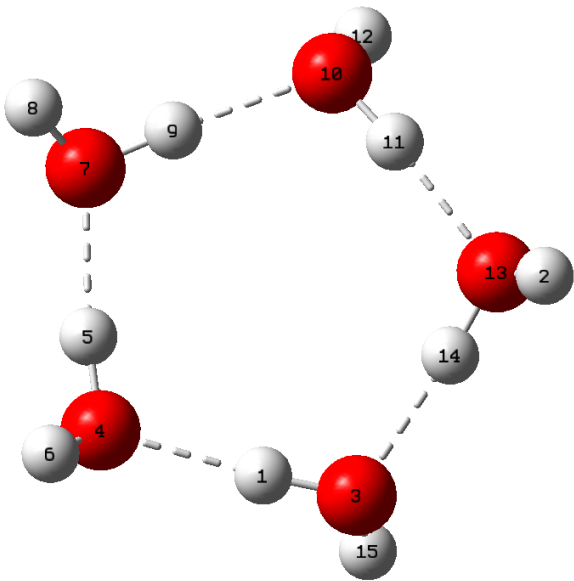

(e)

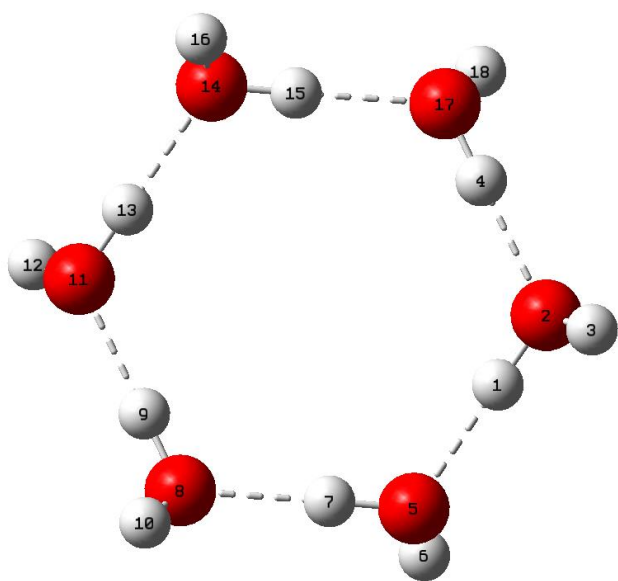

(f)

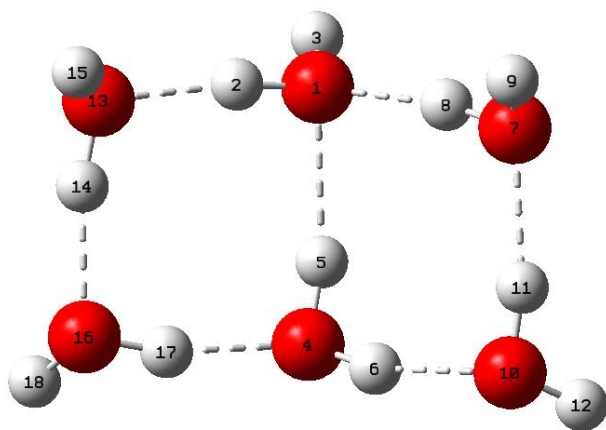

(g)

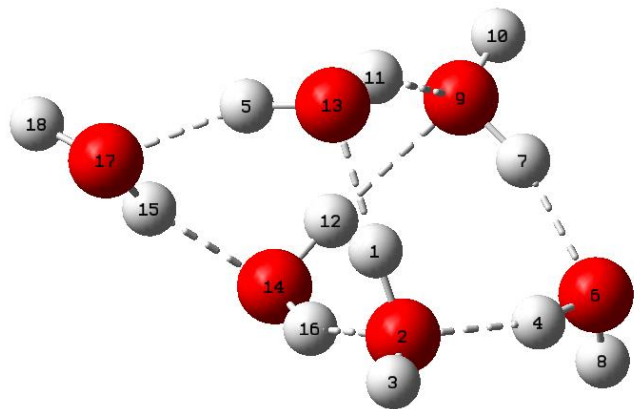

(h)

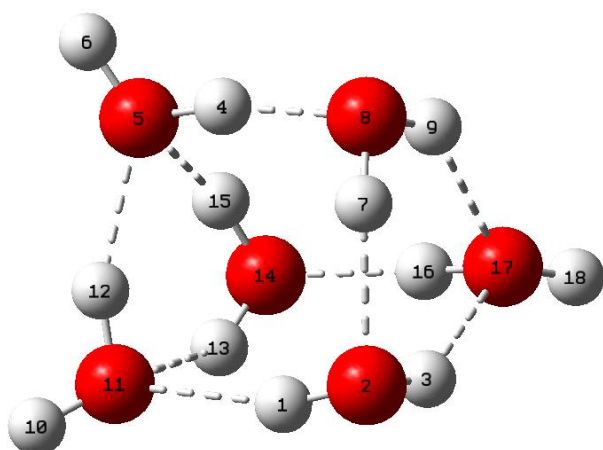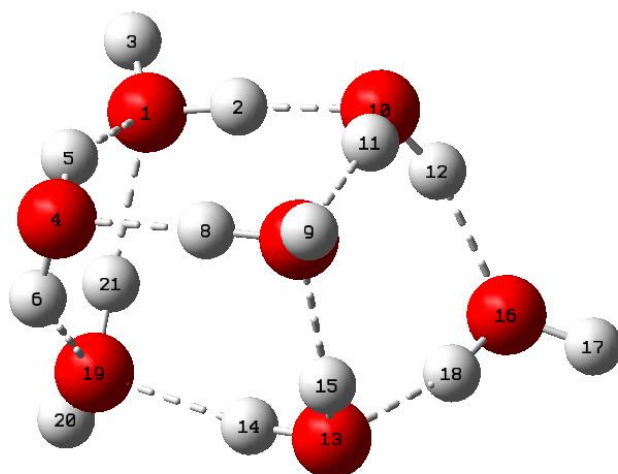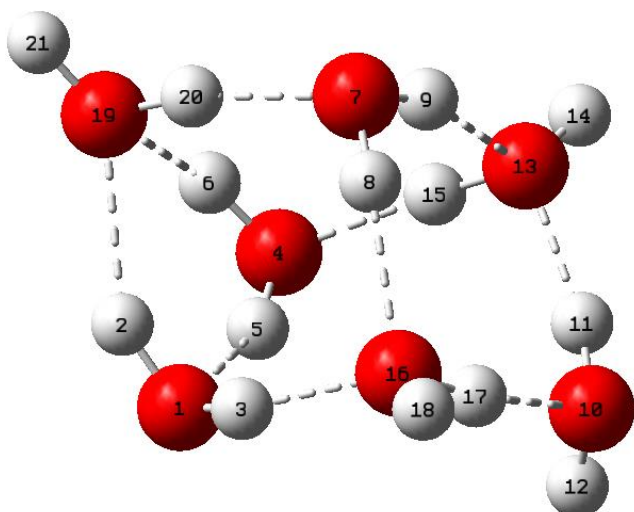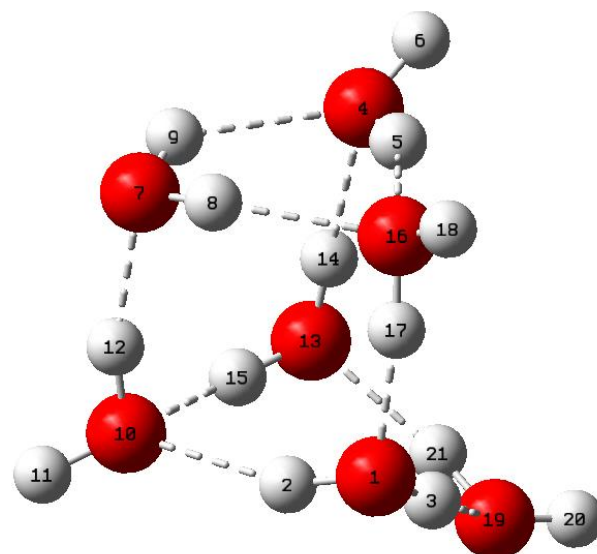

**Table S1.** Geometrical parameters and topological properties of HB at  $\mathbf{r}_{BCP}$  for each HB found in the considered water clusters.

| Model | $\text{O}_d\text{---H}\cdots\text{O}_a$ | $\text{H}\cdots\text{O}_a$<br>(Å) | $\text{O}_d\cdots\text{O}_a$<br>(Å) | $\text{O}_d\text{---H}\cdots\text{O}_a$<br>( $^\circ$ ) | $\rho(\mathbf{r}_{BCP})$<br>( $\text{e a}_0^{-3}$ ) | $\nabla^2\rho(\mathbf{r}_{BCP})$<br>( $\text{e a}_0^{-5}$ ) | $ \mathbf{V} /G$ | H<br>(hartree $\text{a}_0^{-3}$ ) |
|-------|-----------------------------------------|-----------------------------------|-------------------------------------|---------------------------------------------------------|-----------------------------------------------------|-------------------------------------------------------------|------------------|-----------------------------------|
| 2a    | O2-H1...O4                              | 1.947                             | 2.904                               | 170.3                                                   | 2.41E-02                                            | 8.73E-02                                                    | 0.966            | 7.13E-04                          |
| 3a    | O2-H1...O4                              | 1.909                             | 2.783                               | 148.8                                                   | 2.63E-02                                            | 9.82E-02                                                    | 0.966            | 8.06E-04                          |
| 3a    | O4-H5...O7                              | 1.892                             | 2.785                               | 151.0                                                   | 2.79E-02                                            | 1.00E-01                                                    | 0.993            | 1.72E-04                          |
| 3a    | O7-H8...O2                              | 1.874                             | 2.782                               | 150.9                                                   | 2.76E-02                                            | 1.01E-01                                                    | 0.988            | 2.95E-04                          |
| 4a    | O2-H4...O11                             | 1.783                             | 2.742                               | 165.8                                                   | 3.61E-02                                            | 1.06E-01                                                    | 1.138            | -4.26E-03                         |
| 4a    | O11-H10...O8                            | 1.765                             | 2.731                               | 168.3                                                   | 3.82E-02                                            | 1.07E-01                                                    | 1.170            | -5.48E-03                         |
| 4a    | O8-H7...O5                              | 1.783                             | 2.742                               | 165.8                                                   | 3.61E-02                                            | 1.06E-01                                                    | 1.138            | -4.25E-03                         |
| 4a    | O5-H3...O2                              | 1.765                             | 2.731                               | 168.2                                                   | 3.82E-02                                            | 1.07E-01                                                    | 1.170            | -5.47E-03                         |
| 4b    | O2-H4...O11                             | 1.764                             | 2.728                               | 167.3                                                   | 3.83E-02                                            | 1.07E-01                                                    | 1.169            | -5.48E-03                         |
| 4b    | O11-H10...O8                            | 1.764                             | 2.728                               | 167.2                                                   | 3.83E-02                                            | 1.07E-01                                                    | 1.169            | -5.48E-03                         |
| 4b    | O8-H7...O5                              | 1.764                             | 2.728                               | 167.3                                                   | 3.83E-02                                            | 1.08E-01                                                    | 1.169            | -5.48E-03                         |
| 4b    | O5-H3...O2                              | 1.764                             | 2.728                               | 167.3                                                   | 3.83E-02                                            | 1.07E-01                                                    | 1.170            | -5.49E-03                         |
| 5a    | O13-H14...O3                            | 1.732                             | 2.711                               | 175.4                                                   | 4.14E-02                                            | 1.08E-01                                                    | 1.216            | -7.45E-03                         |
| 5a    | O10-H11...O13                           | 1.734                             | 2.715                               | 175.0                                                   | 4.11E-02                                            | 1.09E-01                                                    | 1.211            | -7.26E-03                         |
| 5a    | O7-H9...O10                             | 1.735                             | 2.715                               | 176.4                                                   | 4.12E-02                                            | 1.08E-01                                                    | 1.215            | -7.38E-03                         |
| 5a    | O4-H5...O7                              | 1.752                             | 2.728                               | 173.5                                                   | 3.87E-02                                            | 1.08E-01                                                    | 1.177            | -5.82E-03                         |
| 5a    | O3-H1...O4                              | 1.734                             | 2.714                               | 176.2                                                   | 4.10E-02                                            | 1.08E-01                                                    | 1.211            | -7.24E-03                         |
| 6a    | O14-H15...O17                           | 1.734                             | 2.708                               | 178.4                                                   | 4.16E-02                                            | 1.09E-01                                                    | 1.216            | -7.53E-03                         |
| 6a    | O2-H1...O5                              | 1.733                             | 2.708                               | 178.4                                                   | 4.16E-02                                            | 1.10E-01                                                    | 1.216            | -7.53E-03                         |
| 6a    | O17-H4...O2                             | 1.733                             | 2.708                               | 178.4                                                   | 4.16E-02                                            | 1.10E-01                                                    | 1.216            | -7.53E-03                         |
| 6a    | O8-H9...O11                             | 1.735                             | 2.708                               | 178.4                                                   | 4.16E-02                                            | 1.10E-01                                                    | 1.216            | -7.52E-03                         |
| 6a    | O5-H7...O8                              | 1.733                             | 2.708                               | 178.4                                                   | 4.16E-02                                            | 1.09E-01                                                    | 1.216            | -7.54E-03                         |
| 6a    | O11-H13...O14                           | 1.734                             | 2.708                               | 178.4                                                   | 4.16E-02                                            | 1.10E-01                                                    | 1.216            | -7.53E-03                         |
| 6b    | O1-H2...O13                             | 1.685                             | 2.666                               | 171.7                                                   | 4.71E-02                                            | 1.08E-01                                                    | 1.295            | -1.13E-02                         |
| 6b    | O13-H14...O16                           | 1.702                             | 2.675                               | 168.4                                                   | 4.52E-02                                            | 1.09E-01                                                    | 1.267            | -9.92E-03                         |
| 6b    | O16-H17...O4                            | 1.704                             | 2.675                               | 167.0                                                   | 4.51E-02                                            | 1.09E-01                                                    | 1.264            | -9.75E-03                         |
| 6b    | O10-H11...O7                            | 1.808                             | 2.767                               | 166.9                                                   | 3.38E-02                                            | 1.05E-01                                                    | 1.101            | -2.97E-03                         |
| 6b    | O7-H8...O1                              | 1.814                             | 2.779                               | 170.5                                                   | 3.27E-02                                            | 1.05E-01                                                    | 1.087            | -2.48E-03                         |
| 6b    | O4-H6...O10                             | 1.842                             | 2.794                               | 165.2                                                   | 3.17E-02                                            | 1.01E-01                                                    | 1.072            | -1.97E-03                         |
| 6b    | O4-H5...O1                              | 1.978                             | 2.908                               | 160.6                                                   | 2.27E-02                                            | 8.43E-02                                                    | 0.939            | 1.22E-03                          |
| 6c    | O6-H4...O2                              | 1.798                             | 2.742                               | 161.5                                                   | 3.47E-02                                            | 1.08E-01                                                    | 1.106            | -3.21E-03                         |
| 6c    | O9-H7...O6                              | 1.754                             | 2.710                               | 162.4                                                   | 3.96E-02                                            | 1.09E-01                                                    | 1.183            | -6.08E-03                         |
| 6c    | O17-H15...O14                           | 1.818                             | 2.755                               | 159.5                                                   | 3.45E-02                                            | 1.03E-01                                                    | 1.111            | -3.24E-03                         |
| 6c    | O14-H16...O2                            | 2.007                             | 2.907                               | 153.8                                                   | 2.10E-02                                            | 8.19E-02                                                    | 0.902            | 1.82E-03                          |
| 6c    | O13-H11...O9                            | 1.961                             | 2.869                               | 154.9                                                   | 2.33E-02                                            | 8.85E-02                                                    | 0.933            | 1.38E-03                          |
| 6c    | O14-H12...O9                            | 1.976                             | 2.902                               | 159.4                                                   | 2.33E-02                                            | 8.85E-02                                                    | 0.933            | 1.38E-03                          |
| 6c    | O2-H1...O13                             | 1.663                             | 2.641                               | 166.7                                                   | 5.19E-02                                            | 1.02E-01                                                    | 1.368            | -1.48E-02                         |
| 6c    | O13-H5...O17                            | 1.851                             | 2.776                               | 157.6                                                   | 2.99E-02                                            | 1.05E-01                                                    | 1.029            | -7.72E-04                         |
| 6d    | O8-H7...O2                              | 1.875                             | 2.778                               | 152.5                                                   | 3.09E-02                                            | 1.01E-01                                                    | 1.042            | -1.11E-03                         |

|    |                |       |       |       |          |          |          |           |
|----|----------------|-------|-------|-------|----------|----------|----------|-----------|
| 6d | O5-H4...O8     | 1.648 | 2.632 | 168.9 | 5.36E-02 | 1.02E-01 | 1.387    | -1.61E-02 |
| 6d | O2-H1...O11    | 1.962 | 2.899 | 162.2 | 2.33E-02 | 8.63E-02 | 0.945    | 1.12E-03  |
| 6d | O11-H12...O5   | 1.838 | 2.756 | 155.7 | 3.12E-02 | 1.04E-01 | 1.050    | -1.37E-03 |
| 6d | O14-H13...O11  | 2.077 | 2.861 | 137.1 | 1.82E-02 | 7.75E-02 | 0.833    | 2.78E-03  |
| 6d | O14-H15...O5   | 1.987 | 2.849 | 147.2 | 2.23E-02 | 8.78E-02 | 0.905    | 1.91E-03  |
| 6d | O17-H16...O14  | 1.750 | 2.715 | 166.7 | 4.04E-02 | 1.07E-01 | 1.202    | -6.77E-03 |
| 6d | O2-H3...O17    | 2.048 | 2.910 | 147.4 | 1.93E-02 | 7.73E-02 | 0.867    | 2.27E-03  |
| 6d | O8-H9...O17    | 2.065 | 2.868 | 139.3 | 1.88E-02 | 7.80E-02 | 0.845    | 2.62E-03  |
| 7a | O7-H8...O4     | 1.722 | 2.687 | 166.0 | 4.39E-02 | 1.07E-01 | 1.252    | -9.02E-03 |
| 7a | O10-H11...O7   | 1.929 | 2.854 | 158.7 | 2.49E-02 | 9.21E-02 | 0.963    | 8.17E-04  |
| 7a | O13-H15...O7   | 1.930 | 2.871 | 162.9 | 2.49E-02 | 9.10E-02 | 0.970    | 6.57E-04  |
| 7a | O10-H12...O16  | 1.807 | 2.758 | 163.6 | 3.39E-02 | 1.06E-01 | 1.100    | -2.96E-03 |
| 7a | O16-H18...O13  | 1.753 | 2.712 | 164.8 | 4.03E-02 | 1.07E-01 | 1.199    | -6.65E-03 |
| 7a | O4-H5...O1     | 1.964 | 2.829 | 147.3 | 2.37E-02 | 9.16E-02 | 0.923    | 1.63E-03  |
| 7a | O4-H6...O19    | 2.089 | 2.860 | 135.6 | 1.79E-02 | 7.65E-02 | 0.827    | 2.82E-03  |
| 7a | O13-H14...O19  | 1.910 | 2.866 | 168.1 | 2.63E-02 | 9.27E-02 | 0.996    | 9.21E-05  |
| 7a | O19-H21...O1   | 1.813 | 2.742 | 157.7 | 3.32E-02 | 1.07E-01 | 1.082    | -2.39E-03 |
| 7a | O1-H2...O10    | 1.619 | 2.613 | 172.2 | 5.74E-02 | 1.01E-01 | 1.426    | -1.88E-02 |
| 7a | O7-H5...O1     | 1.964 | 2.829 | 147.3 | 2.37E-02 | 9.16E-02 | 0.923    | 1.63E-03  |
| 7b | O4-H5...O1     | 1.861 | 2.778 | 155.1 | 3.10E-02 | 1.02E-01 | 1.052    | -1.39E-03 |
| 7b | O4-H6...O19    | 2.030 | 2.837 | 139.5 | 2.00E-02 | 8.39E-02 | 0.861    | 2.56E-03  |
| 7b | O19--H20...O7  | 1.720 | 2.692 | 168.2 | 4.37E-02 | 1.07E-01 | 1.251    | -8.96E-03 |
| 7b | O16--H17...O10 | 1.723 | 2.689 | 166.9 | 4.27E-02 | 1.09E-01 | 1.230    | -8.18E-03 |
| 7b | O1-H3...O16    | 1.932 | 2.870 | 162.5 | 2.44E-02 | 9.08E-02 | 0.963    | 8.14E-04  |
| 7b | O7-H8...O16    | 1.906 | 2.848 | 162.9 | 2.65E-02 | 9.42E-02 | 0.994    | 1.35E-04  |
| 7b | O13-H15...O4   | 1.633 | 2.618 | 168.8 | 5.57E-02 | 1.02E-01 | 1.409    | -1.76E-02 |
| 7b | O7-H9...O13    | 1.949 | 2.872 | 158.3 | 2.39E-02 | 8.91E-02 | 0.951    | 1.04E-03  |
| 7b | O10-H11...O13  | 1.786 | 2.747 | 167.0 | 3.58E-02 | 1.06E-01 | 1.134    | -4.10E-03 |
| 7b | O1-H2...O19    | 2.036 | 2.886 | 145.6 | 1.98E-02 | 8.01E-02 | 0.870    | 2.30E-03  |
| 7c | O7-H9...O4     | 2.120 | 2.869 | 133.2 | 1.68E-02 | 7.23E-02 | 0.811    | 2.87E-03  |
| 7c | O1-H2...O10    | 1.926 | 2.851 | 158.6 | 2.51E-02 | 9.23E-02 | 9.67E-01 | 7.44E-04  |
| 7c | O10-H12...O7   | 1.728 | 2.691 | 164.9 | 4.30E-02 | 1.07E-01 | 1.24E+00 | -8.36E-03 |
| 7c | O13-H14...O4   | 1.919 | 2.883 | 172.3 | 2.57E-02 | 9.07E-02 | 0.990    | 2.35E-04  |
| 7c | O13-H15...O10  | 1.945 | 2.977 | 160.9 | 2.41E-02 | 8.93E-02 | 0.957    | 9.18E-04  |
| 7c | O4-H5...O16    | 1.813 | 2.736 | 156.5 | 3.29E-02 | 1.08E-01 | 1.074    | -2.15E-03 |
| 7c | O7-H8...O16    | 1.949 | 2.832 | 150.1 | 2.46E-02 | 9.26E-02 | 0.942    | 1.26E-03  |
| 7c | O16-H17...O1   | 1.610 | 2.606 | 172.2 | 5.84E-02 | 1.01E-01 | 1.436    | -1.96E-02 |
| 7c | O1-H3...O19    | 1.813 | 2.754 | 161.4 | 3.23E-02 | 1.09E-01 | 1.07     | -1.99E-03 |
| 7c | O19--H21...O13 | 1.765 | 2.716 | 162.7 | 3.90E-02 | 1.07E-01 | 1.177    | -5.78E-03 |

**Table S2.** Binding energy per hydrogen bond ( $BE[(H_2O)_n]/nHB$ ) in kcal mol<sup>-1</sup> for (H<sub>2</sub>O)<sub>n</sub> clusters,  $n=2-7$ , at M062X/aug-cc-pVTZ + CP and CCSD(T)/CBS/CBS no CP<sup>1</sup>.

| Cluster<br>(H <sub>2</sub> O) <sub>n</sub> | <i>n</i> | Number<br>of HBs | M062X/aug-cc-pVTZ + CP<br>(kcal mol <sup>-1</sup> ) | CCSD(T)/CBS/CBS no CP <sup>1</sup><br>(kcal mol <sup>-1</sup> ) |
|--------------------------------------------|----------|------------------|-----------------------------------------------------|-----------------------------------------------------------------|
| 2a                                         | 2        | 1                | 5.14                                                | 5.04                                                            |
| 3a                                         | 3        | 3                | 5.74                                                | 5.23                                                            |
| 4a                                         | 4        | 4                | 7.12                                                | 6.65                                                            |
| 4b                                         | 4        | 4                | 7.38                                                | 6.86                                                            |
| 5a                                         | 5        | 5                | 7.68                                                | 7.20                                                            |
| 6a                                         | 6        | 6                | 7.90                                                | 7.43                                                            |
| 6b                                         | 6        | 7                | 6.99                                                | 6.51                                                            |
| 6c                                         | 6        | 8                | 6.34                                                | 5.75                                                            |
| 6d                                         | 6        | 9                | 5.71                                                | 5.13                                                            |
| 7a                                         | 7        | 10               | 6.31                                                | 5.74                                                            |
| 7b                                         | 7        | 10               | 6.29                                                | 5.71                                                            |
| 7c                                         | 7        | 10               | 6.29                                                | 5.69                                                            |

<sup>1</sup> Data from Ref. [47].

**Table S3.** Electron delocalization Index for each HB found in the considered clusters.

| Model | O <sub>d</sub> —H...O <sub>a</sub> | DI(H, O <sub>a</sub> ) |
|-------|------------------------------------|------------------------|
| 2a    | O2-H1...O4                         | 0.066                  |
| 3a    | O2-H1...O4                         | 0.066                  |
| 3a    | O4-H5...O7                         | 0.070                  |
| 3a    | O7-H8...O2                         | 0.069                  |
| 4a    | O2-H4...O11                        | 0.086                  |
| 4a    | O11-H10...O8                       | 0.090                  |
| 4a    | O8-H7...O5                         | 0.086                  |
| 4a    | O5-H3...O2                         | 0.090                  |
| 4b    | O2-H4...O11                        | 0.090                  |
| 4b    | O11-H10...O8                       | 0.090                  |
| 4b    | O8-H7...O5                         | 0.090                  |
| 4b    | O5-H3...O2                         | 0.090                  |
| 5a    | O13-H14...O3                       | 0.094                  |
| 5a    | O10-H11...O13                      | 0.094                  |
| 5a    | O7-H9...O10                        | 0.094                  |
| 5a    | O4-H5...O7                         | 0.089                  |
| 5a    | O3-H1...O4                         | 0.093                  |
| 6a    | O14-H15...O17                      | 0.094                  |
| 6a    | O2-H1...O5                         | 0.094                  |
| 6a    | O17-H4...O2                        | 0.094                  |
| 6a    | O8--H9...O11                       | 0.094                  |
| 6a    | O5-H7...O8                         | 0.094                  |
| 6a    | O11-H13...O14                      | 0.094                  |
| 6b    | O1-H2...O13                        | 0.103                  |

|       |                |       |
|-------|----------------|-------|
| 6b    | O13-H14...O16  | 0.100 |
| 6b    | O16-H17...O4   | 0.100 |
| 6b    | O10-H11...O7   | 0.082 |
| 6b    | O7-H8...O1     | 0.079 |
| 6b    | O4-H6...O10    | 0.079 |
| 6b    | O4-H5...O1     | 0.063 |
| <hr/> |                |       |
| 6c    | O6-H4...O2     | 0.082 |
| 6c    | O9-H7...O6     | 0.091 |
| 6c    | O17-H15...O14  | 0.084 |
| 6c    | O14-H16...O2   | 0.057 |
| 6c    | O13-H11...O9   | 0.062 |
| 6c    | O14-H12...O9   | 0.061 |
| 6c    | O2-H1...O13    | 0.112 |
| 6c    | O13-H5...O17   | 0.073 |
| <hr/> |                |       |
| 6d    | O8-H7...O2     | 0.077 |
| 6d    | O5-H4...O8     | 0.115 |
| 6d    | O2-H1...O11    | 0.063 |
| 6d    | O11-H12...O5   | 0.076 |
| 6d    | O14-H13...O11  | 0.045 |
| 6d    | O14-H15...O5   | 0.058 |
| 6d    | O17-H16...O14  | 0.093 |
| 6d    | O2-H3...O17    | 0.053 |
| 6d    | O8-H9...O17    | 0.049 |
| <hr/> |                |       |
| 7a    | O7-H8...O4     | 0.099 |
| 7a    | O10-H11...O7   | 0.065 |
| 7a    | O13-H15...O7   | 0.067 |
| 7a    | O10-H12...O16  | 0.082 |
| 7a    | O16-H18...O13  | 0.093 |
| 7a    | O4-H5...O1     | 0.061 |
| 7a    | O4-H6...O19    | 0.044 |
| 7a    | O13-H14...O19  | 0.070 |
| 7a    | O19-H21...O1   | 0.080 |
| 7a    | O1-H2...O10    | 0.119 |
| 7a    | O7-H5...O1     | 0.061 |
| <hr/> |                |       |
| 7b    | O4-H5...O1     | 0.078 |
| 7b    | O4-H6--O19     | 0.051 |
| 7b    | O19--H20...O7  | 0.099 |
| 7b    | O16--H17...O10 | 0.096 |
| 7b    | O1-H3...O16    | 0.065 |
| 7b    | O7-H8...O16    | 0.069 |
| 7b    | O13-H15...O4   | 0.117 |
| 7b    | O7-H9...O13    | 0.064 |
| 7b    | O10-H11...O13  | 0.086 |

|    |                |       |
|----|----------------|-------|
| 7b | O1-H2...O19    | 0.053 |
| 7c | O7-H9...O4     | 0.041 |
| 7c | O1-H2...O10    | 0.065 |
| 7c | O10-H12...O7   | 0.097 |
| 7c | O13-H14...O4   | 0.069 |
| 7c | O13-H15...O10  | 0.065 |
| 7c | O4-H5...O16    | 0.078 |
| 7c | O7-H8...O16    | 0.063 |
| 7c | O16-H17...O1   | 0.121 |
| 7c | O1-H3...O19    | 0.076 |
| 7c | O19--H21...O13 | 0.091 |

**Table S4.** Geometrical parameters and atomic source function contributions to HB  $\rho(\mathbf{r}_{BCP})$  for each HB found in the considered water clusters.

| Model | O <sub>d</sub> —H...O <sub>a</sub> | H...O <sub>a</sub><br>(Å) | O <sub>d</sub> ...O <sub>a</sub><br>(Å) | O <sub>d</sub> —H...O <sub>a</sub><br>(°) | %S(H)  | %S(O <sub>d</sub> ) | %S(O <sub>a</sub> ) | %S(H,O <sub>a</sub> ) | %S(O <sub>d</sub> ,H,O <sub>a</sub> ) |
|-------|------------------------------------|---------------------------|-----------------------------------------|-------------------------------------------|--------|---------------------|---------------------|-----------------------|---------------------------------------|
| 2a    | O2-H1...O4                         | 1.947                     | 2.904                                   | 170.3                                     | -37.96 | 76.10               | 27.35               | -10.61                | 65.49                                 |
| 3a    | O2-H1...O4                         | 1.909                     | 2.783                                   | 148.8                                     | -32.19 | 68.61               | 28.26               | -3.93                 | 64.68                                 |
| 3a    | O4-H5...O7                         | 1.892                     | 2.785                                   | 151.0                                     | -29.53 | 66.53               | 29.17               | -0.36                 | 66.17                                 |
| 3a    | O7-H8...O2                         | 1.874                     | 2.782                                   | 150.9                                     | -30.16 | 66.76               | 29.36               | -0.80                 | 65.95                                 |
| 4a    | O2-H4...O11                        | 1.783                     | 2.742                                   | 165.8                                     | -17.98 | 56.44               | 35.48               | 17.50                 | 73.94                                 |
| 4a    | O11-H10...O8                       | 1.765                     | 2.731                                   | 168.3                                     | -15.59 | 54.53               | 36.16               | 20.57                 | 75.10                                 |
| 4a    | O8-H7...O5                         | 1.783                     | 2.742                                   | 165.8                                     | -17.98 | 56.44               | 35.49               | 17.50                 | 73.94                                 |
| 4a    | O5-H3...O2                         | 1.765                     | 2.731                                   | 168.2                                     | -15.59 | 54.54               | 36.15               | 20.56                 | 75.10                                 |
| 4b    | O2-H4...O11                        | 1.764                     | 2.728                                   | 167.3                                     | -15.55 | 54.39               | 36.21               | 20.66                 | 75.05                                 |
| 4b    | O11-H10...O8                       | 1.764                     | 2.728                                   | 167.2                                     | -15.53 | 54.39               | 36.18               | 20.66                 | 75.05                                 |
| 4b    | O8-H7...O5                         | 1.764                     | 2.728                                   | 167.3                                     | -15.58 | 54.47               | 36.13               | 20.55                 | 75.02                                 |
| 4b    | O5-H3...O2                         | 1.764                     | 2.728                                   | 167.3                                     | -15.56 | 54.40               | 36.21               | 20.65                 | 75.05                                 |
| 5a    | O13-H14...O3                       | 1.732                     | 2.711                                   | 175.4                                     | -12.44 | 51.81               | 37.90               | 25.46                 | 77.27                                 |
| 5a    | O10-H11...O13                      | 1.734                     | 2.715                                   | 175.0                                     | -12.73 | 52.09               | 37.80               | 25.07                 | 77.16                                 |
| 5a    | O7-H9...O10                        | 1.735                     | 2.715                                   | 176.4                                     | -12.58 | 52.05               | 37.74               | 25.17                 | 77.22                                 |
| 5a    | O4-H5...O7                         | 1.752                     | 2.728                                   | 173.5                                     | -15.18 | 54.26               | 37.04               | 21.85                 | 76.12                                 |
| 5a    | O3-H1...O4                         | 1.734                     | 2.714                                   | 176.2                                     | -12.82 | 52.14               | 37.81               | 24.99                 | 77.13                                 |
| 6a    | O14-H15...O17                      | 1.734                     | 2.708                                   | 178.4                                     | -12.48 | 51.93               | 38.24               | 25.77                 | 77.70                                 |
| 6a    | O2-H1...O5                         | 1.733                     | 2.708                                   | 178.4                                     | -12.33 | 51.84               | 38.27               | 25.94                 | 77.78                                 |
| 6a    | O17-H4...O2                        | 1.733                     | 2.708                                   | 178.4                                     | -12.34 | 51.88               | 38.21               | 25.87                 | 77.75                                 |
| 6a    | O8--H9...O11                       | 1.735                     | 2.708                                   | 178.4                                     | -12.36 | 51.86               | 38.26               | 25.90                 | 77.76                                 |
| 6a    | O5-H7...O8                         | 1.733                     | 2.708                                   | 178.4                                     | -12.39 | 51.95               | 38.15               | 25.76                 | 77.71                                 |
| 6a    | O11-H13...O14                      | 1.734                     | 2.708                                   | 178.4                                     | -12.32 | 51.84               | 38.28               | 25.96                 | 77.80                                 |
| 6b    | O1-H2...O13                        | 1.685                     | 2.666                                   | 171.7                                     | -7.07  | 46.47               | 39.24               | 32.17                 | 78.64                                 |
| 6b    | O13-H14...O16                      | 1.702                     | 2.675                                   | 168.4                                     | -8.73  | 48.25               | 38.56               | 29.83                 | 78.08                                 |
| 6b    | O16-H17...O4                       | 1.704                     | 2.675                                   | 167.0                                     | -8.83  | 48.37               | 38.67               | 29.84                 | 78.21                                 |



|    |                |       |       |       |        |       |        |        |        |
|----|----------------|-------|-------|-------|--------|-------|--------|--------|--------|
| 6b | O10-H11...O7   | 1.808 | 2.767 | 166.9 | -21.13 | 59.37 | 34.42  | 13.29  | 72.67  |
| 6b | O7-H8...O1     | 1.814 | 2.779 | 170.5 | -22.87 | 60.85 | 33.11  | 10.24  | 71.09  |
| 6b | O4-H6...O10    | 1.842 | 2.794 | 165.2 | -23.63 | 61.35 | 32.62  | 8.99   | 70.34  |
| 6b | O4-H5...O1     | 1.978 | 2.908 | 160.6 | -40.38 | 74.90 | 23.22  | -17.16 | 57.74  |
| 6c | O6-H4...O2     | 1.798 | 2.742 | 161.5 | -19.94 | 57.81 | 33.54  | 13.60  | 71.41  |
| 6c | O9-H7...O6     | 1.754 | 2.710 | 162.4 | -14.05 | 52.51 | 36.06  | 22.01  | 74.52  |
| 6c | O17-H15...O14  | 1.818 | 2.755 | 159.5 | -19.59 | 57.97 | 32.78  | 13.19  | 71.17  |
| 6c | O14-H16...O2   | 2.007 | 2.907 | 153.8 | -44.34 | 77.44 | 20.07  | -24.27 | 53.16  |
| 6c | O13-H11...O9   | 1.961 | 2.869 | 154.9 | -38.73 | 72.70 | 24.82  | -13.92 | 58.78  |
| 6c | O14-H12...O9   | 1.976 | 2.902 | 159.4 | -41.75 | 75.48 | 22.80  | -18.95 | 56.53  |
| 6c | O2-H1...O13    | 1.663 | 2.641 | 166.7 | -3.05  | 42.61 | 39.32  | 36.27  | 78.89  |
| 6c | O13-H5...O17   | 1.851 | 2.776 | 157.6 | -26.72 | 63.05 | 31.40  | 4.68   | 67.73  |
| 6d | O8-H7...O2     | 1.875 | 2.778 | 152.5 | -23.83 | 60.05 | 29.97  | 6.14   | 66.19  |
| 6d | O5-H4...O8     | 1.648 | 2.632 | 168.9 | -2.02  | 41.83 | 39.88  | 37.85  | 79.69  |
| 6d | O2-H1...O11    | 1.962 | 2.899 | 162.2 | -39.10 | 74.19 | 24.84  | -14.26 | 59.93  |
| 6d | O11-H12...O5   | 1.838 | 2.756 | 155.7 | -24.55 | 61.12 | 31.18  | 6.63   | 67.74  |
| 6d | O14-H13...O11  | 2.077 | 2.861 | 137.1 | -47.16 | 78.97 | 16.34  | -30.83 | 48.15  |
| 6d | O14-H15...O5   | 1.987 | 2.849 | 147.2 | -40.01 | 73.53 | 22.30  | -17.71 | 55.82  |
| 6d | O17-H16...O14  | 1.750 | 2.715 | 166.7 | -13.22 | 51.95 | 35.93  | 22.71  | 74.66  |
| 6d | O2-H3...O17    | 2.048 | 2.910 | 147.4 | -47.93 | 80.76 | 19.10  | -28.82 | 51.94  |
| 6d | O8-H9...O17    | 2.065 | 2.868 | 139.3 | -46.65 | 78.26 | 18.41  | -28.24 | 50.02  |
| 7a | O7-H8...O4     | 1.722 | 2.687 | 166.0 | -9.81  | 48.74 | 175.79 | 27.23  | 214.72 |
| 7a | O10-H11...O7   | 1.929 | 2.854 | 158.7 | -35.61 | 70.35 | 194.34 | -9.50  | 229.08 |
| 7a | O13-H15...O7   | 1.930 | 2.871 | 162.9 | -35.82 | 71.10 | 198.73 | -9.83  | 234.01 |
| 7a | O10-H12...O16  | 1.807 | 2.758 | 163.6 | -20.95 | 58.23 | 184.56 | 12.91  | 221.84 |
| 7a | O16-H18...O13  | 1.753 | 2.712 | 164.8 | -13.32 | 52.48 | 178.11 | 23.10  | 217.27 |
| 7a | O4-H5...O1     | 1.964 | 2.829 | 147.3 | -36.95 | 70.92 | 184.20 | -12.94 | 218.18 |
| 7a | O4-H6...O19    | 2.089 | 2.860 | 135.6 | -47.12 | 78.63 | 182.73 | -31.64 | 214.24 |
| 7a | O13-H14...O19  | 1.910 | 2.866 | 168.1 | -32.94 | 68.97 | 201.07 | -5.02  | 237.10 |
| 7a | O19-H21...O1   | 1.813 | 2.742 | 157.7 | -21.81 | 58.82 | 179.55 | 10.68  | 216.57 |
| 7a | O1-H2...O10    | 1.619 | 2.613 | 172.2 | 0.27   | 39.77 | 171.88 | 41.65  | 211.92 |
| 7a | O7-H5...O1     | 1.964 | 2.829 | 147.3 | -36.95 | 70.92 | 184.20 | -12.94 | 218.18 |
| 7b | O4-H5...O1     | 1.861 | 2.778 | 155.1 | -23.76 | 60.30 | 30.44  | 66.98  | 66.98  |
| 7b | O4-H6--O19     | 2.030 | 2.837 | 139.5 | -43.92 | 76.38 | 19.81  | 52.27  | 52.27  |
| 7b | O19--H20...O7  | 1.720 | 2.692 | 168.2 | -10.05 | 49.11 | 37.54  | 76.60  | 76.60  |
| 7b | O16--H17...O10 | 1.723 | 2.689 | 166.9 | -11.15 | 49.95 | 37.78  | 76.58  | 76.58  |
| 7b | O1-H3...O16    | 1.932 | 2.870 | 162.5 | -37.03 | 72.78 | 25.49  | 61.24  | 61.24  |
| 7b | O7-H8...O16    | 1.906 | 2.848 | 162.9 | -32.39 | 68.17 | 27.62  | 63.40  | 63.40  |
| 7b | O13-H15...O4   | 1.633 | 2.618 | 168.8 | -0.80  | 40.63 | 40.59  | 80.42  | 80.42  |
| 7b | O7-H9...O13    | 1.949 | 2.872 | 158.3 | -37.76 | 72.34 | 24.41  | 58.98  | 58.98  |
| 7b | O10-H11...O13  | 1.786 | 2.747 | 167.0 | -18.60 | 56.74 | 34.05  | 72.20  | 72.20  |
| 7b | O1-H2...O19    | 2.036 | 2.886 | 145.6 | -46.37 | 79.19 | 19.76  | 52.57  | 52.57  |
| 7c | O7-H9...O4     | 2.120 | 2.869 | 133.2 | -48.82 | 79.57 | 13.55  | 44.30  | 44.30  |

|    |               |       |       |       |        |       |       |       |       |
|----|---------------|-------|-------|-------|--------|-------|-------|-------|-------|
| 7c | O1-H2...O10   | 1.926 | 2.851 | 158.6 | -35.31 | 70.03 | 26.43 | 61.15 | 61.15 |
| 7c | O10-H12...O7  | 1.728 | 2.691 | 164.9 | -10.72 | 49.52 | 36.83 | 75.63 | 75.63 |
| 7c | O13-H14...O4  | 1.919 | 2.883 | 172.3 | -34.34 | 70.20 | 27.50 | 63.36 | 63.36 |
| 7c | O13-H15...O10 | 1.945 | 2.977 | 160.9 | -37.25 | 72.43 | 25.20 | 60.38 | 60.38 |
| 7c | O4-H5...O16   | 1.813 | 2.736 | 156.5 | -22.29 | 59.40 | 32.36 | 69.47 | 69.47 |
| 7c | O7-H8...O16   | 1.949 | 2.832 | 150.1 | -35.30 | 69.77 | 24.87 | 59.33 | 59.33 |
| 7c | O16-H17...O1  | 1.610 | 2.606 | 172.2 | 0.84   | 39.28 | 41.72 | 81.84 | 81.84 |
| 7c | O1-H3...O19   | 1.813 | 2.754 | 161.4 | -23.35 | 60.42 | 33.43 | 70.49 | 70.49 |
| 7c | O19-H21...O13 | 1.765 | 2.716 | 162.7 | -14.71 | 53.84 | 35.90 | 75.03 | 75.03 |

---
